# Supplementary material for: Beyond enzymatic promiscuity: asymmetric induction by l-proline on lipase catalyzed synthesis of polyfunctionalized 4H-pyrans
Source: Royal Society of Chemistry journal article supplement (doi:10.1039/c5ra08785f), 2015-01-01
Supplement: c5ra08785f1.pdf [file c5ra08785f1.pdf]

## Supplementary information

### **Beyond enzymatic promiscuity: Asymmetric induction by L-proline on lipase catalyzed synthesis of polyfunctionalized 4*H*-pyrans**

Pranjal P Bora, Manisha Bihani and Ghanashyam Bez

*Department of Chemistry, North Eastern Hill University, Shillong-793022*

[bez@nehu.ac.in](mailto:bez@nehu.ac.in)

#### **General remarks**

All reagents were commercially available and used without further purification. All the compounds were characterized by <sup>1</sup>H NMR, <sup>13</sup>C NMR and IR spectroscopy. The IR spectra were recorded on a Perkin Elmer spectrophotometer. <sup>1</sup>H NMR (400 MHz) and <sup>13</sup>C NMR (100 MHz) spectra were obtained on a Bruker AC-400 using CDCl<sub>3</sub> as solvent and TMS as internal standard, unless otherwise stated. Optical rotations were measured on a Perkin Elmer 341 polarimeter. HPLC analyses were performed on an Waters M515 series equipped with a chiral column (detailed for each compound below), using mixtures of *n*-hexane/isopropyl alcohol (IPA) as mobile phase, at 25 °C. For column chromatography, we employed Merck silica gel 60-120 mesh.

**Table 1S** Optimization of catalyst loading<sup>a</sup>

| Entry | PPL (mg)/mmol of aldehyde | Time (h) | % Yield <sup>b</sup> |
|-------|---------------------------|----------|----------------------|
| 1     | 5                         | 48       | 42                   |
| 2     | 10                        | 48       | 65                   |
| 3     | 20                        | 48       | 78                   |
| 4     | 25                        | 36       | 90                   |
| 5     | 30                        | 36       | 88                   |
| 6     | 40                        | 36       | 93                   |

<sup>a</sup>Reaction conditions: 4-Fluoro benzaldehyde (1 mmol), malononitrile (1 mmol) and acetylacetone (1.25 mmol) were stirred with PPL in aqueous acetonitrile (1: 1) (10 mL) at 30 °C. <sup>b</sup>Yield of the pure product, purified by recrystallization from ethanol.

**Table 2S** Optimization of amount of catalyst for enantioselective synthesis of pyrans<sup>a</sup>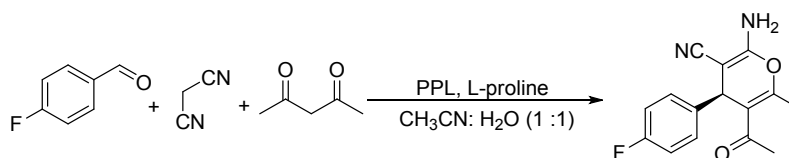

| Entry    | PPL (mg)  | L-proline (mol%) | Time (h)  | % yield <sup>b</sup> | er <sup>c</sup> |
|----------|-----------|------------------|-----------|----------------------|-----------------|
| 1        | 10        | 10               | 36        | 52 <sup>d</sup>      | -nd-            |
| 2        | 10        | 15               | 36        | 62 <sup>d</sup>      | 60: 40          |
| 3        | 20        | 10               | 30        | 90                   | 60: 40          |
| <b>4</b> | <b>20</b> | <b>15</b>        | <b>28</b> | <b>94</b>            | <b>73: 27</b>   |
| 5        | 25        | 15               | 28        | 95                   | 70: 30          |

<sup>a</sup>Reaction conditions: 4-fluoro benzaldehyde (1 mmol), **2** (1 mmol) and **4** (1.25 mmol) were stirred with PPL and L-proline in aqueous acetonitrile (1: 1) at room temperature. <sup>b</sup>Yield of the pure product, purified by recrystallization from ethanol. <sup>c</sup>Enantiomeric ratio (er) was determined by chiral HPLC analysis. <sup>d</sup>Incomplete conversion

## HPLC analysis:

### (a) PPL as a catalyst

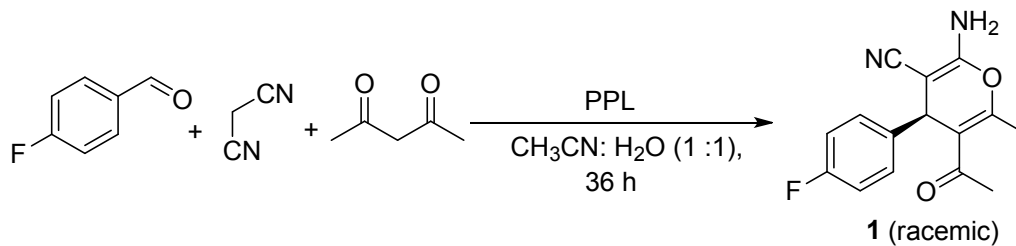

Enantiomeric ratio (50: 50) was determined by chiral HPLC analysis on DIACEL CHIRALPAK AD-H column, isopropanol: n- hexane (12: 88), flow 0.5 ml/min, UV 230 nm.

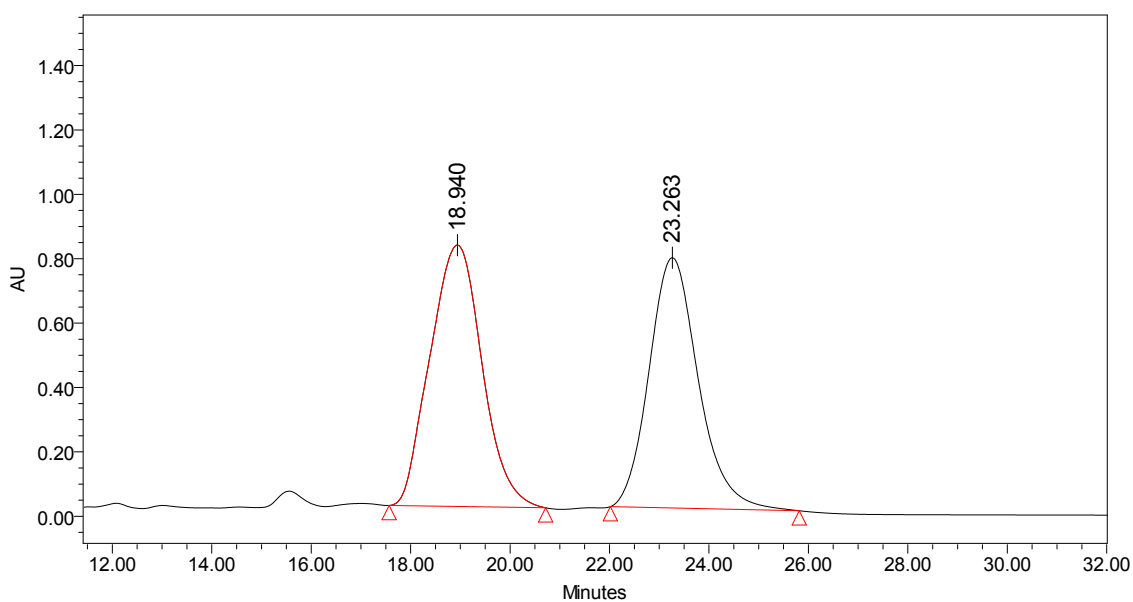

|   | Name | Retention Time | Area     | % Area | Height |
|---|------|----------------|----------|--------|--------|
| 1 |      | 18.940         | 58707624 | 51.72  | 810390 |
| 2 |      | 23.263         | 54800065 | 48.28  | 782793 |

## (2) L-PROLINE as a catalyst

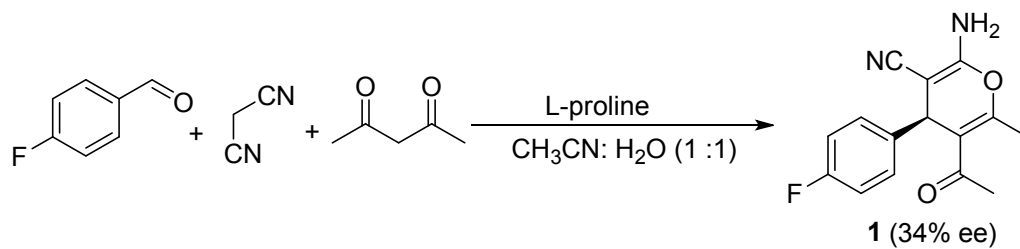

Enantiomeric ratio (33: 67) was determined by chiral HPLC analysis on DIACEL CHIRALPAK AD-H column, isopropanol: n- hexane (12: 88), flow 0.5 ml/min, UV 230 nm.

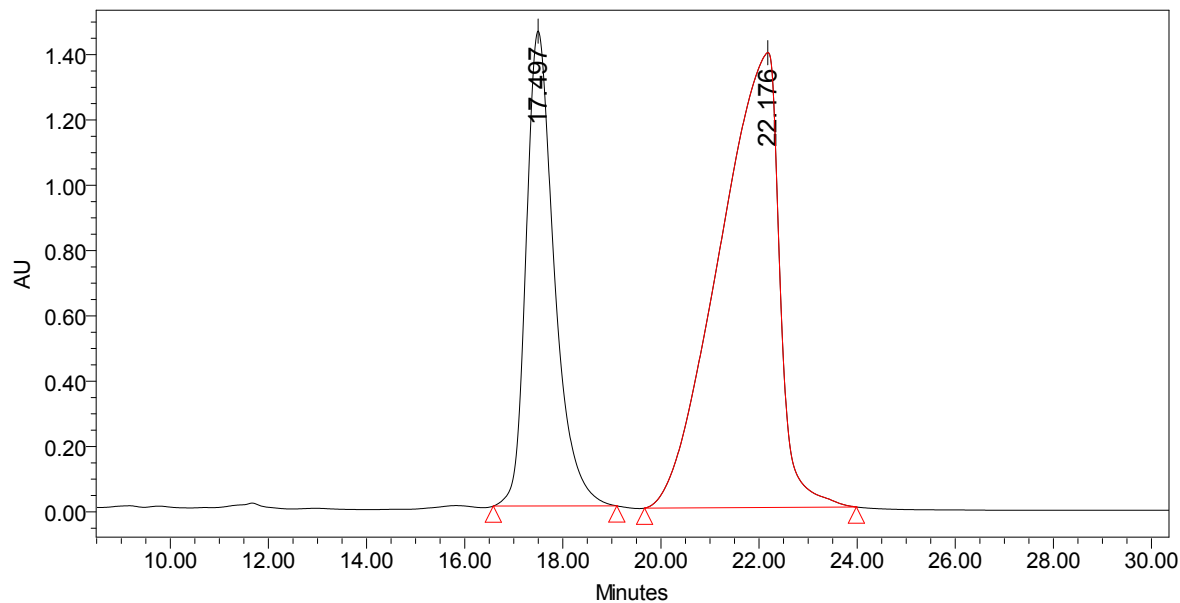

| Name | Retention Time | Area      | % Area | Height  |
|------|----------------|-----------|--------|---------|
| 1    | 17.497         | 58062980  | 32.84  | 1454637 |
| 2    | 22.176         | 118764520 | 67.16  | 1393032 |

### (3) PLL and L-proline as catalysts

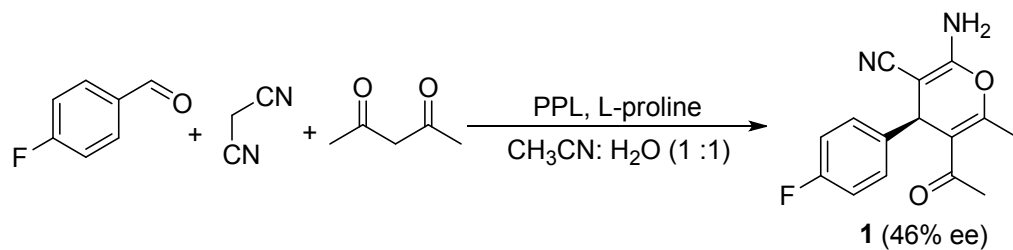

Enantiomeric ratio (27: 73) was determined by chiral HPLC analysis on DIACEL CHIRALPAK AD-H column, isopropanol: n- hexane (12: 88), flow 0.5 ml/min, UV 230 nm.

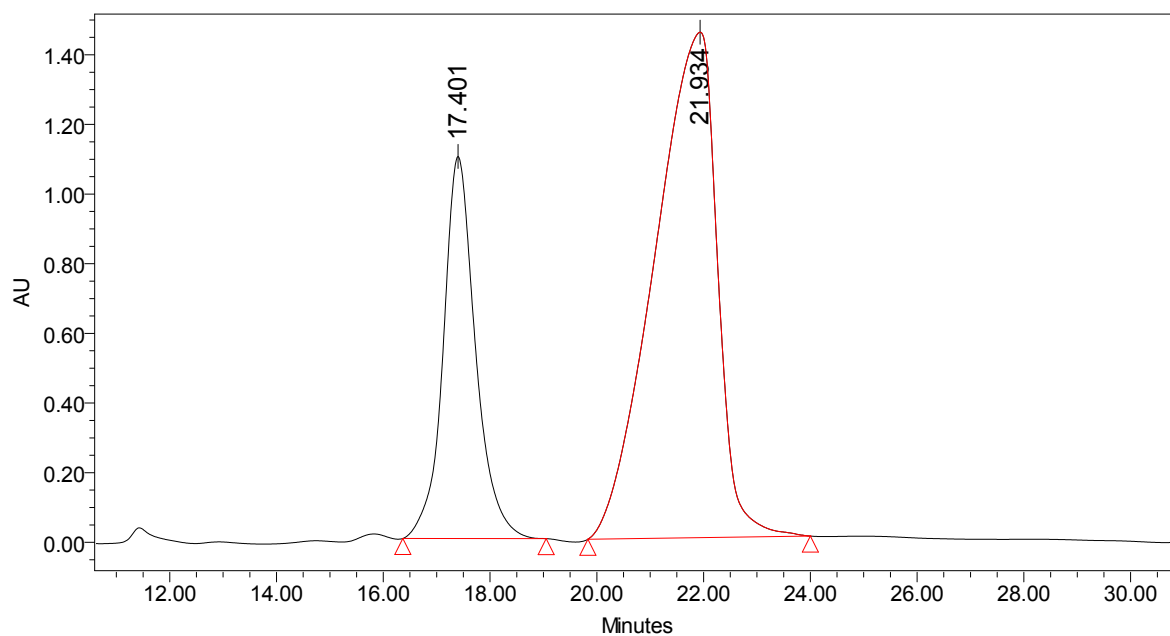

| Name | Retention Time | Area      | % Area | Height  |
|------|----------------|-----------|--------|---------|
| 1    | 17.401         | 44246848  | 27.05  | 1082125 |
| 2    | 21.934         | 119315883 | 72.95  | 1454701 |

Enantiomeric ratio (89: 11) was determined by chiral HPLC analysis on DIACEL CHIRALPAK AD-H column, isopropanol: n- hexane (12: 88), flow 0.5 ml/min, UV 230 nm.

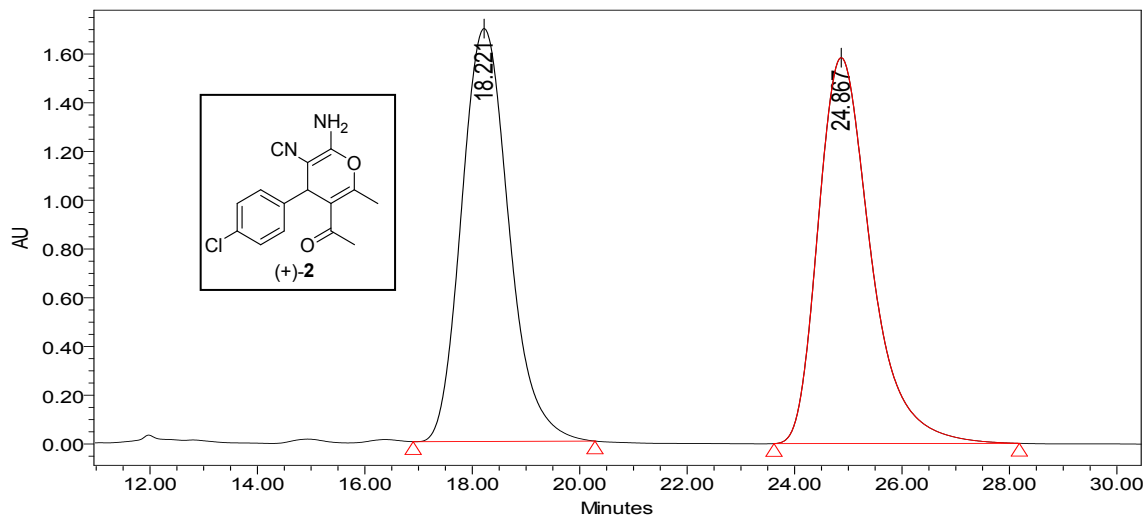

|   | Name | Retention Time | Area      | % Area | Height  | Int Type |
|---|------|----------------|-----------|--------|---------|----------|
| 1 |      | 18.221         | 103642509 | 49.04  | 1694159 | bb       |
| 2 |      | 24.867         | 107690129 | 50.96  | 1583028 | bb       |

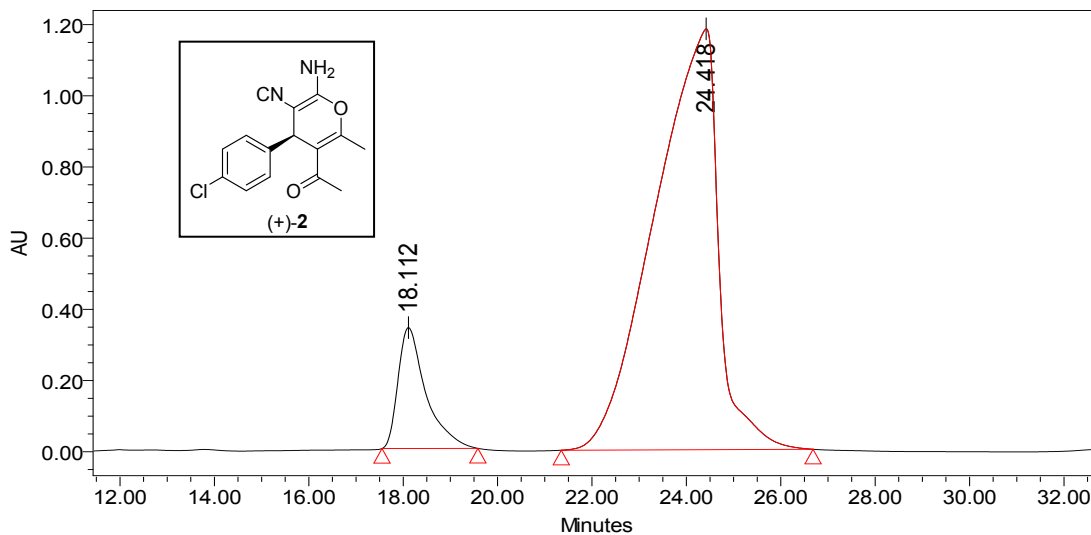

|   | Name | Retention Time | Area      | % Area | Height  | Int Type |
|---|------|----------------|-----------|--------|---------|----------|
| 1 |      | 18.112         | 13316462  | 10.66  | 335221  | bb       |
| 2 |      | 24.418         | 111567842 | 89.34  | 1183913 | bb       |

Enantiomeric ratio (99.6: 0.4) was determined by chiral HPLC analysis on DIACEL CHIRALPAK AD-H column, isopropanol: n- hexane (12: 88), flow 0.5 ml/min, UV 230 nm.

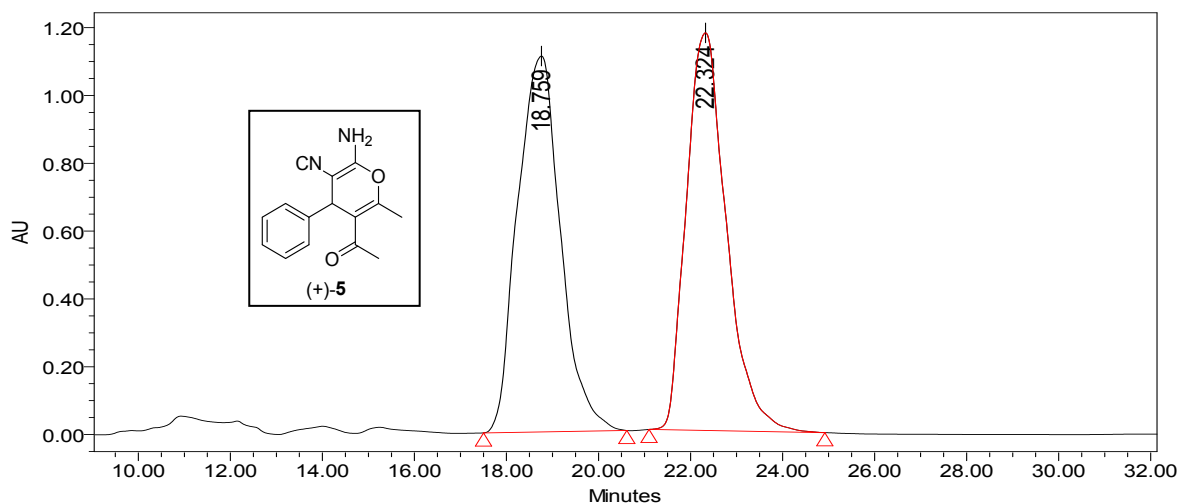

|   | Name | Retention Time | Area     | % Area | Height  |
|---|------|----------------|----------|--------|---------|
| 1 |      | 18.759         | 71962650 | 50.34  | 1108804 |
| 2 |      | 22.324         | 70989379 | 49.66  | 1172817 |

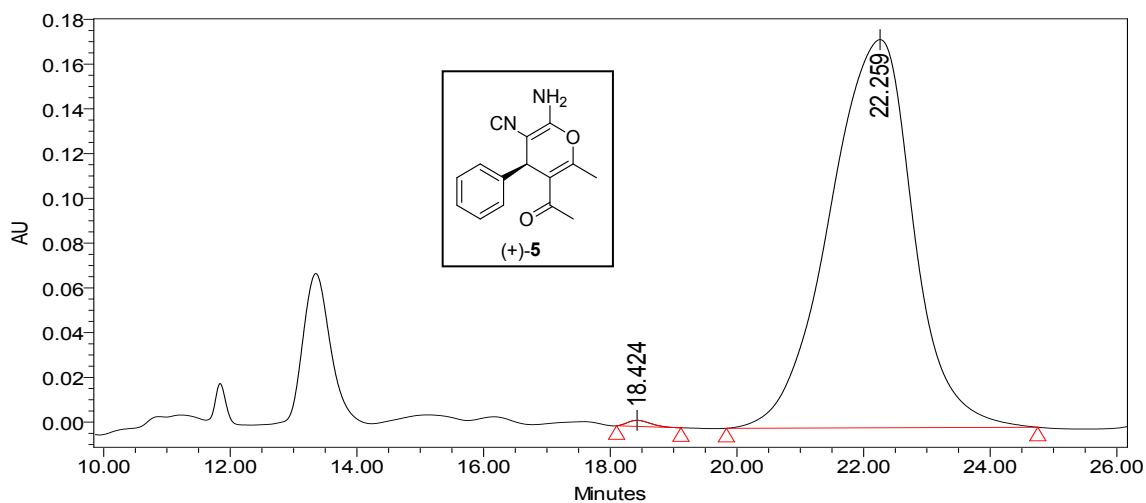

|   | Name | Retention Time | Area     | % Area | Height |
|---|------|----------------|----------|--------|--------|
| 1 |      | 18.424         | 68222    | 0.43   | 2723   |
| 2 |      | 22.259         | 15898443 | 99.57  | 173466 |

Enantiomeric ratio (50: 50) was determined by chiral HPLC analysis on DIACEL CHIRALPAK AD-H column, isopropanol: n- hexane (14: 86), flow 0.5 ml/min, UV 230 nm.

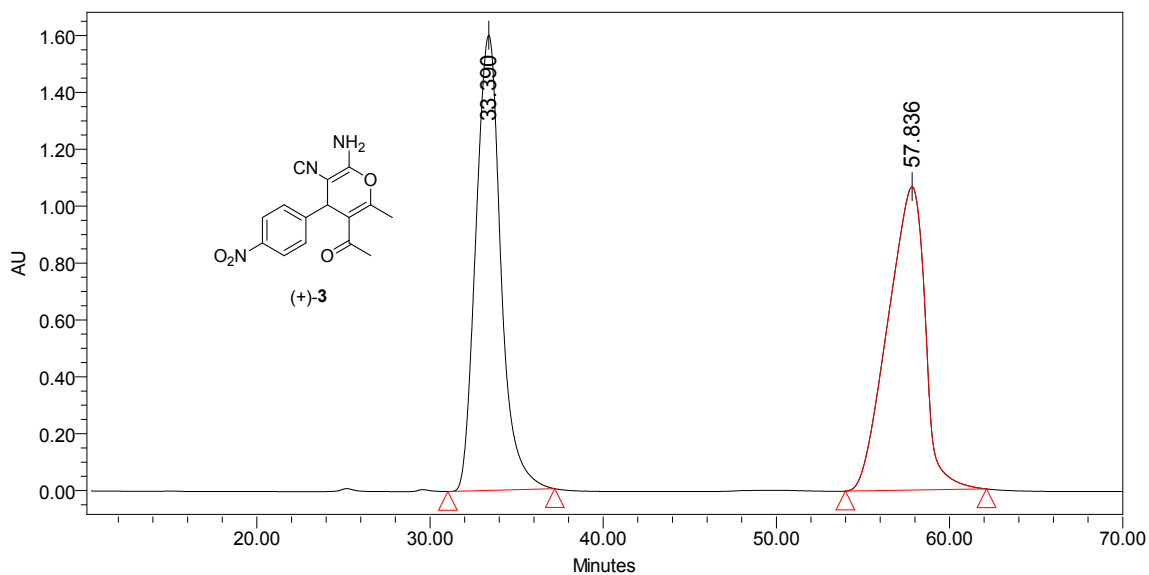

|   | Name | Retention Time | Area      | % Area | Height  |
|---|------|----------------|-----------|--------|---------|
| 1 |      | 33.390         | 160202664 | 50.13  | 1600833 |
| 2 |      | 57.836         | 159388240 | 49.87  | 1067091 |



Enantiomeric ratio (50: 50) was determined by chiral HPLC analysis on DIACEL CHIRALPAK AD-H column, isopropanol: n- hexane (14: 86), flow 0.5 ml/min, UV 230 nm.

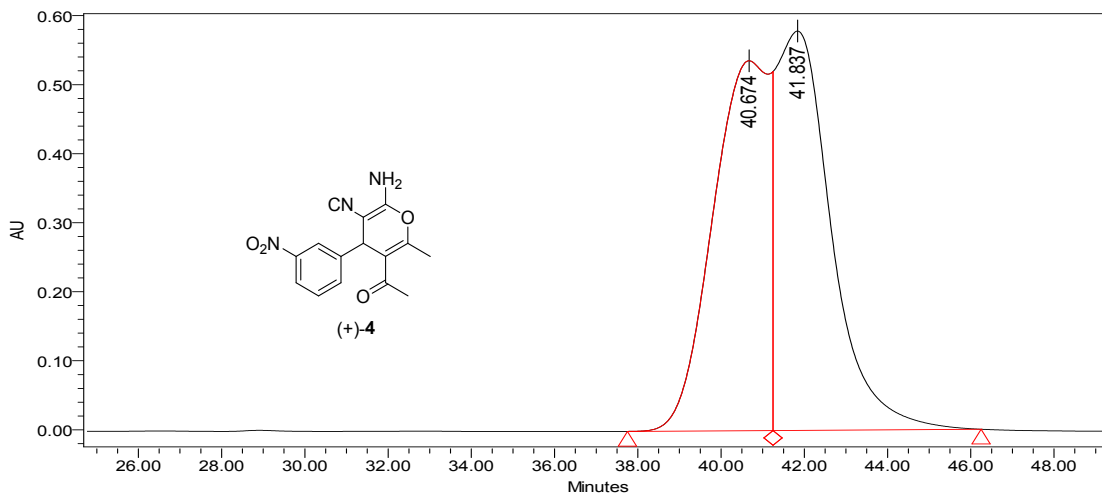

| Name | Retention Time | Area     | % Area | Height |
|------|----------------|----------|--------|--------|
| 1    | 40.674         | 50309772 | 48.73  | 535860 |
| 2    | 41.837         | 52931775 | 51.27  | 578462 |

Enantiomeric ratio (79: 21) was determined by chiral HPLC analysis on DIACEL CHIRALPAK AD-H column, isopropanol: n- hexane (12: 88), flow 0.5 ml/min, UV 230 nm.

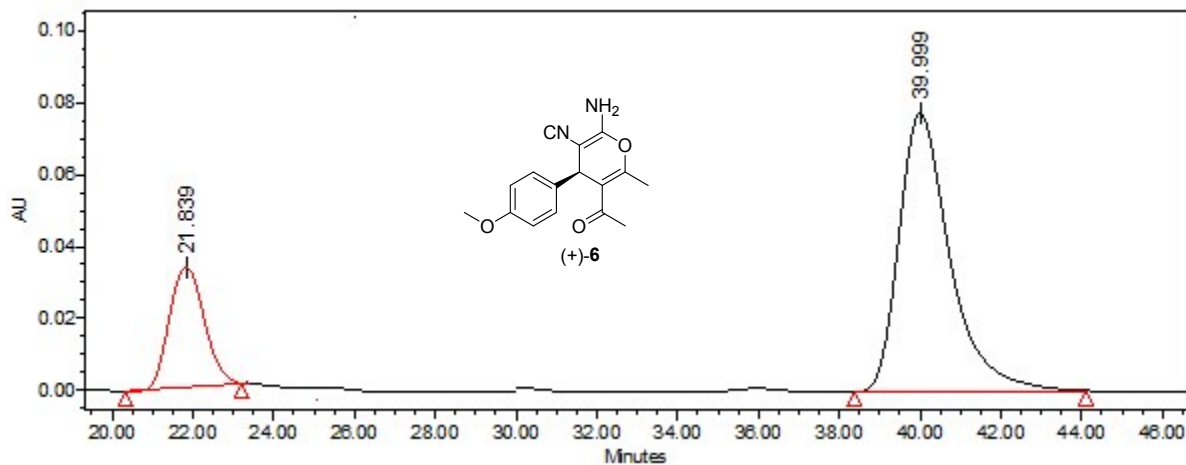

| Name | Retention Time | Area    | % Area | Height |
|------|----------------|---------|--------|--------|
| 1    | 21.839         | 1787428 | 20.87  | 33265  |
| 2    | 39.999         | 6777154 | 79.13  | 77310  |
